# Supplementary material
Source: PubMed Central journal article supplement (PMC4027750)
Supplement: ml400492t_si_001.pdf [file ml400492t_si_001.pdf]

## Supporting Information

# Novel Carboline Derivatives as Potent Antifungal Lead Compounds: Design, Synthesis and Biological Evaluation

Shengzheng Wang,<sup>S,†</sup> Yan Wang,<sup>S,†</sup> Wei Liu,<sup>‡</sup> Yongqiang Zhang,<sup>†</sup> Guoqiang Dong,<sup>†</sup>  
Yang Liu,<sup>†</sup> Zhengang Li,<sup>†</sup> Xiaomeng He,<sup>†</sup> Zhenyuan Miao,<sup>†</sup> Jianzhong Yao,<sup>†</sup> Jian Li,  
& Wannian Zhang<sup>†,\*</sup> and Chunquan Sheng<sup>†,\*</sup>

<sup>†</sup> School of Pharmacy, Second Military Medical University, 325 Guohe Road, Shanghai 200433, People's Republic of China

<sup>‡</sup> School of Medicine, Tongji University, 1239 Siping Road, Shanghai 200092, People's Republic of China

<sup>&</sup> School of Pharmacy, East China University of Science and Technology, Shanghai 200237, P. R. China

### Table of contents

1. Synthetic procedures of the target compounds;
2. Structural characterization of the target compounds;
3. Structure-activity relationships;
4. Experimental protocols of biological assays;
5. A zoom out figure for the morphology of the whole fungi cell;
6. *In vitro* CYP inhibition assessment of positive drugs.

## 1. Synthetic procedures of the target compounds

**Chemistry. General Methods.** All reagents and solvents were reagent grade or were purified by standard methods before use.  $^1\text{H-NMR}$  and  $^{13}\text{C-NMR}$  spectra were recorded on Bruker AVANCE300, AVANCE500, or AVANCE600 spectrometer (Bruker Company, Germany), using TMS as an internal standard and  $\text{CDCl}_3$  or  $\text{DMSO-}d_6$  as solvents. Chemical shifts ( $\delta$  values) and coupling constants ( $J$  values) are given in ppm and Hz, respectively. Elemental analyses were performed with a MOD-1106 instrument and were consistent with theoretical values within 0.4%. The mass spectra were recorded on an Esquire 3000 LC-MS mass spectrometer. TLC analysis was carried out on silica gel plates GF254 (Qindao Haiyang Chemical, China). Silica gel thin-layer chromatography was performed on precoated plates GF-254 (Qingdao Haiyang Chemical, China). Purity of the compounds was analyzed by HPLC using 30:70 MeOH/ $\text{H}_2\text{O}$  as the mobile phase with a flow rate of 0.8 mL/min on a C18 column (Agilent 20RBA  $\times$  SB-C18, 5  $\mu\text{m}$ , 4.6 mm  $\times$  150 mm). All compounds exhibited greater than 95% purity.

Compound **1** was obtained from the Specs Database ([www.specs.net](http://www.specs.net)). The compound ID is AG-205/37199024 and related spectrum was listed as follows.

Sample Report (continued):

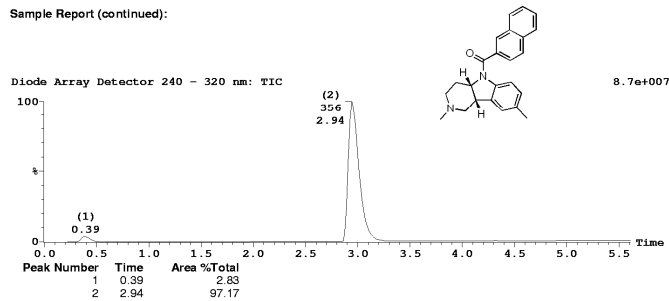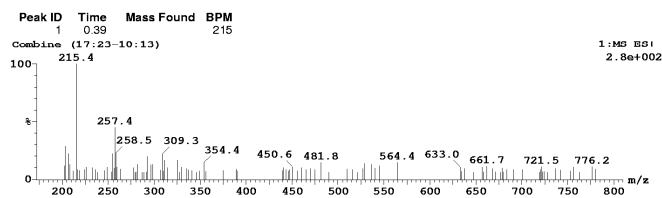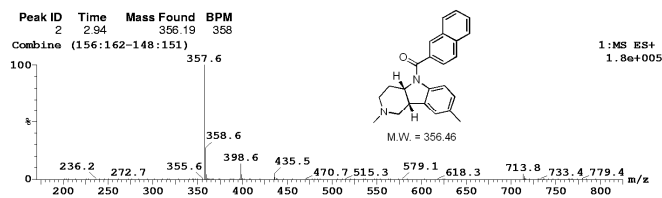

## Chemical synthesis of 5-benzyl-8-chloro-2-methyl-2,3,4,5-tetrahydro-1H-pyrido[4,3-b]indole (C1)

A solution of 8-chloro-2-methyl-2,3,4,5-tetrahydro-1H-pyrido[4,3-b]indole<sup>1</sup> (**4**, 0.22 g, 1 mmol) and NaH (0.036 g, 1.5 mmol) in 20 mL DMF was stirred at room temperature for 15 min. Then, benzyl bromide (0.17 g, 1 mmol) was added and stirred for 6 h. After reaction, the solution was diluted by H<sub>2</sub>O (40 mL) and extracted by EtOAc (50 mL × 3). The organic layer was combined, dried with Na<sub>2</sub>SO<sub>4</sub>, and concentrated under reduced pressure. The residue was purified by column

chromatography (CH<sub>2</sub>Cl<sub>2</sub>: MeOH = 100: 1) to give compound **C1** as yellow solid (0.19 g, 62.4%). <sup>1</sup>H-NMR δ: 2.55 (s, 3H), 2.76-2.82 (m, 4H), 3.65 (s, 2H), 5.20 (s, 2H), 6.94 (m, 2H), 7.03 (d, *J* = 8.4 Hz, 1H), 7.08 (d, *J* = 8.4 Hz, 1H), 7.21-7.25 (m, 3H), 7.39 (s, 1H). <sup>13</sup>C-NMR (CDCl<sub>3</sub>, 150 MHz) δ: 22.91, 45.62, 46.72, 51.61, 52.38, 110.38, 117.40, 121.35, 125.09, 126.19 (2C), 127.62, 128.97 (2C), 134.95, 135.40, 137.46. MS (ESI, positive) *m/z* calcd for C<sub>19</sub>H<sub>20</sub>ClN<sub>2</sub> (M+H): 311.13; found 311.01. Anal. calcd. for C<sub>19</sub>H<sub>19</sub>ClN<sub>2</sub>: C, 73.42; H, 6.16; N, 9.01. Found: C, 73.41; H, 6.15; N, 9.01. HPLC purity: 97.2%.

The synthetic method for compounds **C2-C6** and **C8-C10** was similar to the synthesis of compound **C1**.

#### **Chemical synthesis of 2-(8-chloro-2-methyl-3,4-dihydro-1*H*-pyrido[4,3-*b*]indol-5(2*H*)-yl)-1-phenylethanol (C7)**

A solution of Intermediate **4** (0.10 g, 0.45 mmol) and NaH (0.029 g) in 15 mL DMF was stirred at room temperature for 15 min. Then, 2-phenyloxirane (0.16 g, 1.35 mmol) was added and stirred at 45°C for overnight. After reaction, the solution was diluted by H<sub>2</sub>O (40 mL) and extracted by EtOAc (50 mL×3). The organic layer was combined, dried with Na<sub>2</sub>SO<sub>4</sub>, and concentrated under reduced pressure. Then the residue was purified by column chromatography (CH<sub>2</sub>Cl<sub>2</sub>: MeOH = 100: 3) to give compound **C7** as white solid 0.10 g (65.3%). <sup>1</sup>H-NMR (CDCl<sub>3</sub>, 600 MHz) δ: 2.48 (s, 3H), 2.63 (m, 1H), 2.78 (m, 2H), 2.86 (m, 1H), 3.54 (s, 2H), 4.07-4.15 (m, 2H), 4.84 (m, 1H), 7.07 (dd, *J*<sub>1</sub> = 1.8 Hz, *J*<sub>2</sub> = 8.4 Hz, 1H), 7.18 (d, *J* = 8.4 Hz, 1H), 7.17 (d, *J* = 9.0 Hz, 1H), 7.25-7.30 (m, 6H). <sup>13</sup>C-NMR (CDCl<sub>3</sub>, 150 MHz) δ: 22.88, 45.22, 51.34,

51.45, 52.34, 73.56, 106.99, 110.57, 117.23, 121.08, 124.87, 125.88 (2C), 126.54, 128.14, 128.70 (2C), 135.30, 135.35, 142.35. MS (ESI, positive)  $m/z$  calcd for  $C_{20}H_{22}ClN_2O$  (M+H): 341.14; found 341.09. Anal. calcd. for  $C_{20}H_{21}ClN_2O$ : C, 70.48; H, 6.21; N, 8.22. Found: C, 70.47; H, 6.20; N, 8.23. HPLC purity: 98.2%.

**Chemical synthesis of 6-chloro-5-(3-(4-chlorophenoxy)propyl)-2-methyl-2,3,4,5-tetrahydro-1H-pyrido[4,3-b]indole (C11)**

To a solution of 4-chlorophenol (6.43 g, 0.05 mol) and  $K_2CO_3$  (6.9 g, 0.05 mol) in 50 mL EtOH, 1,3-dibromopropane (21.09 g, 0.10 mol) was added dropwise and stirred at 80°C for 4 h. After reaction, the solvent was removed under reduced pressure, diluted with  $H_2O$  (70 mL) and extracted by EtOAc (80 mL $\times$ 3). Then, the organic layer was separated, dried with  $Na_2SO_4$ , and concentrated under reduced pressure. The residue was purified by column chromatography (hexane) to give 1-(3-bromopropoxy)-4-chlorobenzene as transparent oil: 9.89 g (79.3%).  $^1H$ -NMR ( $CDCl_3$ , 600 MHz)  $\delta$ : 2.30 (m, 2H), 3.59 (t,  $J = 6.0$  Hz, 2H), 4.07 (t,  $J = 6.0$  Hz, 2H), 6.83 (d, 2H), 7.22 (d, 2H).  $^{13}C$ -NMR ( $CDCl_3$ , 150 MHz)  $\delta$ : 29.77, 32.20, 65.60, 116.00, 125.75, 129.30, 157.26. MS (ESI, positive)  $m/z$  calcd for  $C_9H_{11}BrClO$  (M+H): 248.97; found 249.06.

A solution of Intermediate **4** (0.10 g, 0.45 mmol) and KOH (0.1 g, 1.8 mmol) in 20 mL DMSO was stirred at room temperature for 15 min. Then, 1-(3-bromopropoxy)-4-chlorobenzene (0.11 g, 0.45 mmol) was added and stirred at room temperature for overnight. Then, the reaction was diluted by  $H_2O$  (40 mL) and extracted by EtOAc (50 mL  $\times$  3). The organic layer was separated, dried with  $Na_2SO_4$ ,

and concentrated under reduced pressure. The residue was purified by column chromatography (CH<sub>2</sub>Cl<sub>2</sub>: MeOH = 100: 1) to give the target compound **C11** as yellow oil (0.10 g, 57.1%). <sup>1</sup>H-NMR (CDCl<sub>3</sub>, 600 MHz)  $\delta$ : 2.54 (m, 2H), 2.55 (s, 3H), 2.80 (t, *J* = 5.4 Hz, 2H), 2.86 (t, *J* = 5.4 Hz, 2H), 3.66 (s, 2H), 3.90 (t, *J* = 6.0 Hz, 2H), 4.59 (t, *J* = 7.2 Hz, 2H), 6.79-6.81 (d, *J* = 9.0 Hz, 2H), 6.98 (t, *J* = 7.8 Hz, 1H), 7.11 (d, *J* = 8.0 Hz, 1H), 7.23-7.24 (d, *J* = 9.0 Hz, 2H), 7.27 (d, *J* = 8.0 Hz, 1H). <sup>13</sup>C-NMR (CDCl<sub>3</sub>, 150 MHz)  $\delta$ : 22.40, 31.83, 41.32, 45.05, 51.29, 52.25, 64.87, 115.68, 116.16, 116.32, 119.96, 123.07, 125.79, 128.90, 129.38, 129.56, 131.63, 134.72, 157.16. MS (ESI, positive) *m/z* calcd for C<sub>21</sub>H<sub>23</sub>Cl<sub>2</sub>N<sub>2</sub>O (M+H): 389.12; found 389.13. Anal. calcd. for C<sub>21</sub>H<sub>22</sub>Cl<sub>2</sub>N<sub>2</sub>O: C, 64.79; H, 5.70; N, 7.20. Found: C, 64.77; H, 5.69; N, 7.21. HPLC purity: 96.1%. The synthetic method for compounds **C12-C18** was similar to the synthesis of compound **C11**.

**Chemical synthesis of 5-(3-(4-chlorophenoxy)propyl)-8-fluoro-2,3,4,5-tetrahydro-1H-pyrido[4,3-b]indole (C38)**

To a solution of ethyl 8-fluoro-3,4-dihydro-1H-pyrido[4,3-b]indole-2(5H)-carboxylate (**6**, 0.10 g, 0.38 mmol) in 10 mL DMSO, KOH (21 mg, 0.38 mmol) was added and stirred at room temperature for 15 min. Then, 1-(3-bromopropoxy)-4-chlorobenzene (**7**, 78 mg, 0.38 mmol) was added and stirred at room temperature for overnight. After reaction, the solution was diluted with H<sub>2</sub>O (50 mL) and extracted by EtOAc (40 mL×3). Then, the organic layer was separated, dried with Na<sub>2</sub>SO<sub>4</sub>, and concentrated under reduced pressure. The residue was purified by column chromatography (PE: EtOAc = 5: 1) to give ethyl 5-(3-(4-chlorophenoxy)propyl)-

8-fluoro-3,4-dihydro-1H-pyrido[4,3-b]indole-2(5H)-carboxylate (intermediate **8**) as yellow oil 0.12 g (73.4%).  $^1\text{H-NMR}$  (300 Hz,  $\text{CDCl}_3$ )  $\delta$ : 1.30 (t,  $J = 7.2$  Hz, 3H), 2.20 (m, 2H), 2.79 (br, 2H), 3.71-3.87 (br, 4H), 4.19 (q,  $J = 7.2$  Hz, 2H), 4.26 (t,  $J = 6.7$  Hz, 2H), 4.59-4.69 (br, 2H), 6.78 (d,  $J = 8.8$  Hz, 2H), 6.87 (d,  $J = 9.1$  Hz, 1H), 7.10 (d,  $J = 9.4$  Hz, 1H), 7.18 (s, 1H), 7.26 (d,  $J = 8.8$  Hz, 2H).  $^{13}\text{C-NMR}$  ( $\text{CDCl}_3$ , 75 MHz)  $\delta$ : 14.86, 29.78, 39.65, 41.22, 41.23, 61.72, 64.43, 109.28, 109.63, 109.70, 109.82, 115.75 (2C), 115.67, 126.09, 129.58 (2C), 133.08, 156.30, 157.13, 159.41. MS (ESI, positive)  $m/z$  calcd for  $\text{C}_{23}\text{H}_{25}\text{ClFN}_2\text{O}_3$  (M+H): 431.15; found 431.12. Anal. calcd. for  $\text{C}_{23}\text{H}_{24}\text{ClFN}_2\text{O}_3$ : C, 64.11; H, 5.61; N, 6.50. Found: C, 64.12; H, 5.62; N, 6.50.

To a solution of intermediate **8** (0.20 g, 0.47 mmol) in 5 mL EtOH, Claisen hydrolysate (KOH, 1.2 g;  $\text{H}_2\text{O}$ , 0.5 mL; EtOH, 5 mL) was added and stirred at  $80^\circ\text{C}$  for 3h. After reaction, the solvent was removed under reduced pressure, and the residue was purified by column chromatography ( $\text{CH}_2\text{Cl}_2$ : MeOH = 100: 5) to give compound **C38** as yellow oil 0.10 g (60.1%).  $^1\text{H-NMR}$  (500 Hz,  $\text{CDCl}_3$ )  $\delta$ : 2.19 (m, 2H), 2.79 (t,  $J = 5.6$  Hz, 2H), 3.23 (t,  $J = 5.7$  Hz, 2H), 3.81 (t,  $J = 6.6$  Hz, 2H), 4.07 (s, 2H), 4.23 (t,  $J = 5.5$  Hz, 2H), 6.78~7.26 (m, 7H).  $^{13}\text{C-NMR}$  ( $\text{CDCl}_3$ , 75 MHz)  $\delta$ : 22.15, 29.66, 39.50, 41.55, 42.70, 64.35, 102.75, 103.06, 109.26, 109.59, 109.71, 115.70 (2C), 125.59, 129.43, 129.47 (2C), 132.76, 134.46, 157.02. MS (ESI, positive)  $m/z$  calcd for  $\text{C}_{20}\text{H}_{21}\text{ClFN}_2\text{O}$  (M+H): 359.13; found 359.07. Anal. calcd. for  $\text{C}_{20}\text{H}_{20}\text{ClFN}_2\text{O}$ : C, 66.94; H, 5.62; N, 7.81. Found: C, 66.96; H, 5.63; N, 7.82. HPLC purity: 96.5%. The synthetic method for compounds **C19-C37** and **C39-C42** was similar to the synthesis of compound **C38**.

## 2. Structural characterization of the target compounds

### **8-chloro-5-(2-chlorobenzyl)-2-methyl-2,3,4,5-tetrahydro-1H-pyrido[4,3-b]indole**

**(C2).** Brown solid, 0.15 g (59.8%). <sup>1</sup>H-NMR (CDCl<sub>3</sub>, 600 MHz)  $\delta$ : 2.57 (s, 3H, NCH<sub>3</sub>), 2.84-2.86 (m, 4H, ArCH<sub>2</sub>CH<sub>2</sub>N), 3.68 (s, 2H, ArCH<sub>2</sub>NCH<sub>3</sub>), 5.18 (s, 2H, ArCH<sub>2</sub>N), 6.78 (d,  $J = 7.2$  Hz, 1H, Ar-H), 7.02 (s, 1H, Ar-H), 7.06 (s, 1H, Ar-H), 7.17 (t,  $J = 7.8$  Hz, 1H, Ar-H), 7.21 (d,  $J = 8.4$  Hz, 1H, Ar-H), 7.40 (s, 1H, Ar-H). MS (ESI, positive)  $m/z$  calcd for C<sub>19</sub>H<sub>19</sub>Cl<sub>2</sub>N<sub>2</sub> (M+H): 345.09; found 345.01. Anal. calcd. for C<sub>19</sub>H<sub>18</sub>Cl<sub>2</sub>N<sub>2</sub>: C, 66.09; H, 5.25; N, 8.11. Found: C, 66.07; H, 5.25; N, 8.12. HPLC purity: 97.2%.

### **8-chloro-5-(3-chlorobenzyl)-2-methyl-2,3,4,5-tetrahydro-1H-pyrido[4,3-b]indole**

**(C3).** Brown solid, 0.14 g (64.8%). <sup>1</sup>H-NMR (CDCl<sub>3</sub>, 600 MHz)  $\delta$ : 2.54 (s, 3H, NCH<sub>3</sub>), 2.72-2.81 (m, 4H, ArCH<sub>2</sub>CH<sub>2</sub>N), 3.63 (s, 2H, ArCH<sub>2</sub>NCH<sub>3</sub>), 5.14 (s, 2H, ArCH<sub>2</sub>N), 6.84 (d,  $J = 8.4$  Hz, 2H, Ar-H), 7.02 (s, 2H, Ar-H), 7.18 (d,  $J = 8.4$  Hz, 2H, Ar-H), 7.39 (s, 1H, Ar-H). <sup>13</sup>C-NMR (CDCl<sub>3</sub>, 75 MHz)  $\delta$ : 23.06, 45.80, 46.08, 51.61, 52.40, 108.54, 110.19, 117.51, 121.41, 125.20, 126.91, 127.54 (2C), 129.12 (2C), 133.43, 134.91, 135.21, 135.99. MS (ESI, positive)  $m/z$  calcd for C<sub>19</sub>H<sub>19</sub>Cl<sub>2</sub>N<sub>2</sub> (M+H): 345.09; found 345.11. Anal. calcd. for C<sub>19</sub>H<sub>18</sub>Cl<sub>2</sub>N<sub>2</sub>: C, 66.09; H, 5.25; N, 8.11. Found: C, 66.08; H, 5.26; N, 8.12. HPLC purity: 96.1%.

### **(2-bromophenyl)(8-chloro-2-methyl-3,4-dihydro-1H-pyrido[4,3-b]indol-5(2H)-yl)**

**methanone (C4).** White solid, 0.21 g (63.7%). <sup>1</sup>H-NMR (CDCl<sub>3</sub>, 600 MHz)  $\delta$ : 2.53 (s, 2H, ArCH<sub>2</sub>CH<sub>2</sub>N), 2.54 (s, 3H, NCH<sub>3</sub>), 2.69 (s, 2H, ArCH<sub>2</sub>CH<sub>2</sub>N), 3.61 (s, 2H, ArCH<sub>2</sub>N), 7.15-7.45 (m, 7H, Ar-H). <sup>13</sup>C-NMR (CDCl<sub>3</sub>, 150 MHz)  $\delta$ : 26.09, 29.68,



45.52, 51.04, 52.50, 116.64, 117.35, 120.02, 124.38, 127.86, 129.02, 129.45, 129.88, 132.01, 133.38, 134.32, 134.72, 138.05, 166.69. MS (ESI, positive) m/z calcd for C<sub>19</sub>H<sub>17</sub>BrClN<sub>2</sub>O (M+H): 403.02; found 403.12. Anal. calcd. for C<sub>19</sub>H<sub>16</sub>BrClN<sub>2</sub>O: C, 56.53; H, 3.99; N, 6.94. Found: C, 56.54; H, 4.00; N, 6.93. HPLC purity: 96.0%.

**(8-chloro-2-methyl-3,4-dihydro-1H-pyrido[4,3-b]indol-5(2H)-yl)(3-chlorophenyl) methanone (C5).** White solid, 0.16 g (68.9%). <sup>1</sup>H-NMR (CDCl<sub>3</sub>, 600 MHz) δ: 2.53 (s, 3H, NCH<sub>3</sub>), 2.61-2.69 (m, 4H, ArCH<sub>2</sub>CH<sub>2</sub>N), 3.59 (s, 2H, ArCH<sub>2</sub>N), 7.10-7.59 (m, 7H, Ar-H). <sup>13</sup>C-NMR (CDCl<sub>3</sub>, 75 MHz) δ: 26.90, 45.72, 51.22, 52.55, 116.21, 116.42, 117.62, 123.97, 127.42, 129.06, 129.22, 129.55, 130.17, 132.72, 134.90, 135.13, 137.10, 167.50. MS (ESI, positive) m/z calcd for C<sub>19</sub>H<sub>17</sub>Cl<sub>2</sub>N<sub>2</sub>O (M+H): 359.07; found 359.14. Anal. calcd. for C<sub>19</sub>H<sub>16</sub>Cl<sub>2</sub>N<sub>2</sub>O: C, 63.52; H, 4.49; N, 7.80. Found: C, 63.51; H, 4.47; N, 7.81. HPLC purity: 97.4%.

**(8-chloro-2-methyl-3,4-dihydro-1H-pyrido[4,3-b]indol-5(2H)-yl)(4-chlorophenyl) methanone (C6).** White solid, 0.21 g (66.9%). <sup>1</sup>H-NMR (CDCl<sub>3</sub>, 600 MHz) δ: 2.53 (s, 3H, NCH<sub>3</sub>), 2.66 (m, 4H, ArCH<sub>2</sub>CH<sub>2</sub>N), 3.58 (s, 2H, ArCH<sub>2</sub>N), 7.09 (dd, J<sub>1</sub> = 1.8 Hz, J<sub>2</sub> = 9.0 Hz, 1H, Ar-H), 7.32 (d, J = 1.8 Hz, 1H, Ar-H), 7.34 (d, J = 9.0 Hz, 1H, Ar-H), 7.47 (d, J = 8.4 Hz, 2H, Ar-H), 7.61 (d, J = 8.4 Hz, 2H, Ar-H). MS (ESI, positive) m/z calcd for C<sub>19</sub>H<sub>17</sub>Cl<sub>2</sub>N<sub>2</sub>O (M+H): 359.07; found 359.11. Anal. calcd. for C<sub>19</sub>H<sub>16</sub>Cl<sub>2</sub>N<sub>2</sub>O: C, 63.52; H, 4.49; N, 7.80. Found: C, 63.50; H, 4.49; N, 7.81. HPLC purity: 95.3%.

**1-(8-chloro-2-methyl-3,4-dihydro-1H-pyrido[4,3-b]indol-5(2H)-yl)-2-phenylethan one (C8).** Brown solid, 0.10 g (42.3%). <sup>1</sup>H-NMR (CDCl<sub>3</sub>, 600 MHz) δ: 2.54 (s, 3H,

NCH<sub>3</sub>), 2.79 (t,  $J = 5.8$  Hz, 2H, ArCH<sub>2</sub>CH<sub>2</sub>N), 3.17 (t, 2H, ArCH<sub>2</sub>CH<sub>2</sub>N), 3.57 (s, 2H, ArCH<sub>2</sub>N), 4.24 (s, 2H, ArCH<sub>2</sub>CO), 7.21-8.07 (m, 8H, Ar-H). MS (ESI, positive)  $m/z$  calcd for C<sub>20</sub>H<sub>20</sub>ClN<sub>2</sub>O (M+H): 339.13; found 339.19. Anal. calcd. for C<sub>20</sub>H<sub>19</sub>ClN<sub>2</sub>O: C, 70.90; H, 5.65; N, 8.27. Found: C, 70.89; H, 5.64; N, 8.28. HPLC purity: 98.6%.

**8-chloro-2-methyl-5-(prop-2-yn-1-yl)-2,3,4,5-tetrahydro-1H-pyrido[4,3-b]indole**

**(C9)**. Brown solid, 0.15 g (55.7%). <sup>1</sup>H-NMR (CDCl<sub>3</sub>, 600 MHz)  $\delta$ : 2.28 (s, 1H, C $\equiv$ CH), 2.89-2.93 (m, 4H, ArCH<sub>2</sub>CH<sub>2</sub>N), 3.65 (s, 2H, ArCH<sub>2</sub>N), 4.74 (s, 2H, CH<sub>2</sub>C $\equiv$ CH), 7.14 (dd,  $J_1 = 1.8$  Hz,  $J_2 = 9.0$  Hz, 1H, Ar-H), 7.27 (d,  $J = 9.0$  Hz, 1H, Ar-H), 7.37 (d,  $J = 1.8$  Hz, Ar-H). <sup>13</sup>C-NMR (CDCl<sub>3</sub>, 150 MHz)  $\delta$ : 22.74, 29.83, 32.59, 45.66, 51.47, 52.28, 72.78, 77.93, 108.81, 110.11, 117.54, 121.46, 125.43, 127.17, 134.49, 134.80. MS (ESI, positive)  $m/z$  calcd for C<sub>15</sub>H<sub>16</sub>ClN<sub>2</sub> (M+H): 259.10; found 258.98. Anal. calcd. for C<sub>15</sub>H<sub>15</sub>ClN<sub>2</sub>: C, 69.63; H, 5.84; N, 10.83. Found: C, 69.62; H, 5.83; N, 10.84. HPLC purity: 97.7%.

**2-(8-chloro-2-methyl-3,4-dihydro-1H-pyrido[4,3-b]indol-5(2H)-yl)acetonitrile**

**(C10)**. Brown solid, 0.13 g (46.7%). <sup>1</sup>H-NMR (CDCl<sub>3</sub>, 600 MHz)  $\delta$ : 2.58 (s, 3H, NCH<sub>3</sub>), 2.89 (s, 4H, ArCH<sub>2</sub>CH<sub>2</sub>N), 3.62 (s, 2H, ArCH<sub>2</sub>N), 4.87 (s, 2H, CH<sub>2</sub>CN), 7.18-7.21 (m, 2H, Ar-H), 7.39 (d,  $J = 1.2$  Hz, Ar-H). MS (ESI, positive)  $m/z$  calcd for C<sub>14</sub>H<sub>15</sub>ClN<sub>3</sub> (M+H): 260.10; found 260.04. Anal. calcd. for C<sub>14</sub>H<sub>14</sub>ClN<sub>3</sub>: C, 64.74; H, 5.43; N, 16.18. Found: C, 64.75; H, 5.43; N, 16.19. HPLC purity: 96.2%.

**5-(3-(4-chlorophenoxy)propyl)-2,7-dimethyl-2,3,4,5-tetrahydro-1H-pyrido[4,3-b]i**

**ndole (C12)**. Yellow solid, 0.16 g (61.5%). <sup>1</sup>H-NMR (CDCl<sub>3</sub>, 600 MHz)  $\delta$ : 2.18 (m, 2H, NCH<sub>2</sub>CH<sub>2</sub>CH<sub>2</sub>O), 2.34 (s, 3H, NCH<sub>3</sub>), 2.60 (s, 3H, ArCH<sub>3</sub>), 2.88 (m, 4H,

ArCH<sub>2</sub>CH<sub>2</sub>N), 3.78 (s, 2H, ArCH<sub>2</sub>N), 3.80 (t,  $J = 5.8$  Hz, 2H, NCH<sub>2</sub>CH<sub>2</sub>CH<sub>2</sub>O), 4.22 (t,  $J = 6.6$  Hz, 2H, OCH<sub>2</sub>), 6.78-7.26 (m, 7H, Ar-H). MS (ESI, positive)  $m/z$  calcd for C<sub>22</sub>H<sub>26</sub>ClN<sub>2</sub>O (M+H): 369.17; found 369.10. Anal. calcd. for C<sub>22</sub>H<sub>25</sub>ClN<sub>2</sub>O: C, 71.63; H, 6.83; N, 7.59. Found: C, 71.62; H, 6.83; N, 7.60. HPLC purity: 96.4%.

**5-(3-(4-chlorophenoxy)propyl)-2-methyl-8-(trifluoromethyl)-2,3,4,5-tetrahydro-1H-pyrido[4,3-b]indole (C13).** Yellow oil, 0.17 g (63.9%). <sup>1</sup>H-NMR (CDCl<sub>3</sub>, 600 MHz)  $\delta$ : 2.21 (m, 2H, NCH<sub>2</sub>CH<sub>2</sub>CH<sub>2</sub>O), 2.68 (s, 3H, NCH<sub>3</sub>), 3.00 (m, 4H, ArCH<sub>2</sub>CH<sub>2</sub>N), 3.82 (t,  $J = 5.8$  Hz, 2H, OCH<sub>2</sub>), 3.87 (s, 2H, ArCH<sub>2</sub>N), 4.30 (t,  $J = 6.6$  Hz, 2H, NCH<sub>2</sub>CH<sub>2</sub>CH<sub>2</sub>O), 6.78 (d,  $J = 9.0$  Hz, 2H, Ar-H), 7.23 (d,  $J = 9.0$  Hz, 2H, Ar-H), 7.35 (s, 2H, Ar-H), 7.67 (s, 1H, Ar-H). MS (ESI, positive)  $m/z$  calcd for C<sub>22</sub>H<sub>23</sub>ClF<sub>3</sub>N<sub>2</sub>O (M+H): 423.15; found 423.05. Anal. calcd. for C<sub>22</sub>H<sub>22</sub>ClF<sub>3</sub>N<sub>2</sub>O: C, 62.49; H, 5.24; N, 6.62. Found: C, 62.48; H, 5.23; N, 6.63. HPLC purity: 96.8%.

**8-chloro-5-(3-(4-chlorophenoxy)propyl)-2-methyl-2,3,4,5-tetrahydro-1H-pyrido[4,3-b]indole (C14).** Yellow oil, 0.16 g (55.9%). <sup>1</sup>H-NMR (CDCl<sub>3</sub>, 600 MHz)  $\delta$ : 2.18 (m, 2H, NCH<sub>2</sub>CH<sub>2</sub>CH<sub>2</sub>O), 2.57 (s, 3H, NCH<sub>3</sub>), 2.84 (m, 4H, ArCH<sub>2</sub>CH<sub>2</sub>N), 3.69 (s, 2H, ArCH<sub>2</sub>N), 3.81 (t,  $J = 6.0$  Hz, 2H, NCH<sub>2</sub>CH<sub>2</sub>CH<sub>2</sub>O), 4.23 (t,  $J = 6.6$  Hz, 2H, OCH<sub>2</sub>), 6.77-6.79 (d,  $J = 9.0$  Hz, 2H, Ar-H), 7.03(dd,  $J_1 = 1.8$  Hz,  $J_2 = 8.0$  Hz, 1H, Ar-H), 7.17 (d,  $J = 8.0$  Hz, 1H, Ar-H), 7.22-7.23 (d,  $J = 9.0$  Hz, 2H, Ar-H), 7.35 (d, 1H,  $J = 1.8$  Hz, Ar-H). MS (ESI, positive)  $m/z$  calcd for C<sub>21</sub>H<sub>23</sub>Cl<sub>2</sub>N<sub>2</sub>O (M+H): 389.12; found 389.04. Anal. calcd. for C<sub>21</sub>H<sub>22</sub>Cl<sub>2</sub>N<sub>2</sub>O: C, 64.79; H, 5.70; N, 7.20. Found: C, 64.78; H, 5.68; N, 7.21. HPLC purity: 95.3%.

**5-(3-(4-chlorophenoxy)propyl)-8-methoxy-2-methyl-2,3,4,5-tetrahydro-1H-pyrid**

**o[4,3-*b*]indole (C15).** Yellow oil, 0.19 g (66.7%). <sup>1</sup>H-NMR (CDCl<sub>3</sub>, 600 MHz) δ: 2.18 (m, 2H, NCH<sub>2</sub>CH<sub>2</sub>CH<sub>2</sub>O), 2.54 (s, 3H, NCH<sub>3</sub>), 2.78-2.81 (m, 4H, ArCH<sub>2</sub>CH<sub>2</sub>N), 3.64 (s, 2H, ArCH<sub>2</sub>N), 3.80 (t, *J* = 5.7 Hz, 2H, OCH<sub>2</sub>), 3.82 (s, 3H, OCH<sub>3</sub>), 4.20 (t, *J* = 6.6 Hz, 2H, NCH<sub>2</sub>CH<sub>2</sub>CH<sub>2</sub>O), 6.73 (dd, *J*<sub>1</sub> = 1.8 Hz, *J*<sub>2</sub> = 8.0 Hz, 1H, Ar-H), 6.76-6.77 (d, *J* = 9.0 Hz, 2H, Ar-H), 6.85 (d, *J* = 1.8 Hz, 1H, Ar-H), 7.14 (d, *J* = 8.0 Hz, 1H, Ar-H), 7.18-7.21 (d, *J* = 9.0 Hz, 2H, Ar-H). <sup>13</sup>C-NMR (CDCl<sub>3</sub>, 75 MHz) δ: 20.76, 29.67, 39.74, 43.45, 51.29, 51.69, 56.03, 64.40, 100.14, 110.19, 111.67, 115.79 (2C), 125.58, 126.03, 129.65 (2C), 129.73, 131.77, 131.88, 154.30, 157.10. MS (ESI, positive) *m/z* calcd for C<sub>22</sub>H<sub>26</sub>ClN<sub>2</sub>O<sub>2</sub> (M+H): 385.17; found 385.14. Anal. calcd. for C<sub>22</sub>H<sub>25</sub>ClN<sub>2</sub>O<sub>2</sub>: C, 68.65; H, 6.55; N, 7.28. Found: C, 68.64; H, 6.54; N, 7.29. HPLC purity: 97.2%.

**6,8-dichloro-5-(3-(4-chlorophenoxy)propyl)-2-methyl-2,3,4,5-tetrahydro-1*H*-pyrido[4,3-*b*]indole (C16).** Yellow solid, 0.10 g (55.3%). <sup>1</sup>H-NMR (CDCl<sub>3</sub>, 600 MHz) δ: 2.21 (m, 2H, NCH<sub>2</sub>CH<sub>2</sub>CH<sub>2</sub>O), 2.52 (s, 3H, -CH<sub>3</sub>), 2.75 (t, *J* = 5.4 Hz, 2H, ArCH<sub>2</sub>CH<sub>2</sub>N), 2.81 (t, *J* = 5.4 Hz, 2H, ArCH<sub>2</sub>CH<sub>2</sub>N), 3.56 (s, 2H, ArCH<sub>2</sub>N), 3.88 (t, *J* = 5.8 Hz, 2H, NCH<sub>2</sub>CH<sub>2</sub>CH<sub>2</sub>O), 4.53 (t, *J* = 7.2 Hz, 2H, OCH<sub>2</sub>), 6.76-6.79 (d, 2H, Ar-H), 7.08 (d, *J* = 1.8 Hz, 1H, Ar-H), 7.21-7.24 (d, 2H, Ar-H), 7.24 (d, *J* = 1.8 Hz, 1H, Ar-H). MS (ESI, positive) *m/z* calcd for C<sub>21</sub>H<sub>22</sub>Cl<sub>3</sub>N<sub>2</sub>O (M+H): 423.08; found 423.12. Anal. calcd. for C<sub>21</sub>H<sub>21</sub>Cl<sub>3</sub>N<sub>2</sub>O: C, 59.52; H, 4.99; N, 6.61. Found: C, 59.52; H, 4.98; N, 6.60. HPLC purity: 98.2%.

**8-chloro-5-(3-(4-chlorophenoxy)propyl)-2-ethyl-2,3,4,5-tetrahydro-1*H*-pyrido[4,3-*b*]indole (C17).** Yellow oil, 0.21 g (69.1%). <sup>1</sup>H-NMR (CDCl<sub>3</sub>, 600 MHz) δ: 1.23 (t,

3H,  $J = 7.2$  Hz,  $\text{CH}_3$ ), 2.18 (m, 2H,  $-\text{NCH}_2\text{CH}_2\text{CH}_2\text{O}-$ ), 2.69 (q,  $J = 7.2$  Hz, 2H,  $\text{NCH}_2\text{CH}_3$ ), 2.85 (m, 4H,  $\text{ArCH}_2\text{CH}_2\text{N}$ ), 3.69 (s, 2H,  $\text{ArCH}_2\text{N}$ ), 3.81 (t,  $J = 6.0$  Hz, 2H,  $\text{NCH}_2\text{CH}_2\text{CH}_2\text{O}$ ), 4.21 (t,  $J = 6.6$  Hz, 2H,  $\text{OCH}_2$ ), 6.77-6.79 (d, 2H, Ar-H), 7.02 (dd,  $J_1 = 1.8$  Hz,  $J_2 = 8.0$  Hz, 1H, Ar-H), 7.16 (d,  $J = 8.0$  Hz, 1H, Ar-H), 7.22-7.24 (d, 2H, Ar-H), 7.36 (d,  $J = 1.8$  Hz, 1H, Ar-H).  $^{13}\text{C}$ -NMR ( $\text{CDCl}_3$ , 125 MHz)  $\delta$ : 12.54, 22.82, 29.74, 39.49, 48.92, 50.18, 51.68, 64.04, 107.71, 109.82, 115.71, 117.22, 120.94, 124.73, 125.89, 126.81, 129.41, 134.96, 157.06. MS (ESI, positive)  $m/z$  calcd for  $\text{C}_{22}\text{H}_{25}\text{Cl}_2\text{N}_2\text{O}$  (M+H): 403.13; found 403.11. Anal. calcd. for  $\text{C}_{22}\text{H}_{24}\text{Cl}_2\text{N}_2\text{O}$ : C, 65.51; H, 6.00; N, 6.95. Found: C, 65.50; H, 6.01; N, 6.96. HPLC purity: 98.2%.

**8-chloro-5-(3-(4-chlorophenoxy)propyl)-2-propyl-2,3,4,5-tetrahydro-1H-pyrido[4,3-b]indole (C18)**. Yellow oil, 0.18 g (55.9%).  $^1\text{H}$ -NMR ( $\text{CDCl}_3$ , 600 MHz)  $\delta$ : 0.96 (t, 3H,  $J = 7.2$  Hz,  $\text{CH}_3$ ), 1.66 (m, 2H,  $\text{NCH}_2\text{CH}_2\text{CH}_3$ ), 2.18 (m, 2H,  $\text{NCH}_2\text{CH}_2\text{CH}_2\text{O}$ ), 2.57 (m, 2H,  $\text{NCH}_2\text{CH}_2\text{CH}_3$ ), 2.83 (m, 4H,  $\text{ArCH}_2\text{CH}_2\text{N}$ ), 3.68 (s, 2H,  $\text{ArCH}_2\text{N}$ ), 3.81 (t,  $J = 5.7$  Hz, 2H,  $\text{NCH}_2\text{CH}_2\text{CH}_2\text{O}$ ), 4.22 (t,  $J = 6.6$  Hz, 2H,  $\text{OCH}_2$ ), 6.78 (d, 2H, Ar-H), 7.03 (dd,  $J_1 = 1.8$  Hz,  $J_2 = 8.0$  Hz, 1H, Ar-H), 7.16 (d,  $J = 8.0$  Hz, 1H, Ar-H), 7.23 (d, 2H, Ar-H), 7.36 (d,  $J = 1.8$  Hz, 1H, Ar-H).  $^{13}\text{C}$ -NMR ( $\text{CDCl}_3$ , 75 MHz)  $\delta$ : 12.10, 20.79, 22.97, 29.87, 39.59, 49.56, 50.65, 60.09, 64.53, 108.06, 109.93, 115.82 (2C), 117.34, 121.00, 124.80, 126.00, 126.98, 129.54 (2C), 135.04, 135.22, 157.20. MS (ESI, positive)  $m/z$  calcd for  $\text{C}_{23}\text{H}_{27}\text{Cl}_2\text{N}_2\text{O}$  (M+H): 417.15; found 417.09. Anal. calcd. for  $\text{C}_{23}\text{H}_{26}\text{Cl}_2\text{N}_2\text{O}$ : C, 66.19; H, 6.28; N, 6.71. Found: C, 66.18; H, 6.29; N, 6.72. HPLC purity: 98.5%.

**4-fluoro-N-(3-(8-fluoro-3,4-dihydro-1H-pyrido[4,3-b]indol-5(2H)-yl)propyl)anilin**

**e (C19).** Pale solid, 0.08 g (50.1%). <sup>1</sup>H-NMR (500 Hz, CDCl<sub>3</sub>) δ: 1.92 (m, 2 H, -NCH<sub>2</sub>CH<sub>2</sub>CH<sub>2</sub>NH-), 2.93 (t, 2 H, ArCH<sub>2</sub>CH<sub>2</sub>N), 3.07 (t, 2 H, ArCH<sub>2</sub>CH<sub>2</sub>N), 3.46 (t, 2 H, -NCH<sub>2</sub>CH<sub>2</sub>CH<sub>2</sub>NH-), 4.23 (t, *J* = 7.0 Hz, 2 H, -NCH<sub>2</sub>CH<sub>2</sub>CH<sub>2</sub>NH-), 4.27 (s, 2 H, ArCH<sub>2</sub>N), 6.51~7.53 (m, 7 H, Ar-H). MS (ESI, positive) *m/z* calcd for C<sub>20</sub>H<sub>22</sub>F<sub>2</sub>N<sub>3</sub> (M+H): 342.18; found 342.21. Anal. calcd. for C<sub>20</sub>H<sub>21</sub>F<sub>2</sub>N<sub>3</sub>: C, 70.36; H, 6.20; N, 12.31. Found: C, 70.35; H, 6.20; N, 12.32. HPLC purity: 95.4%.

**8-fluoro-5-(3-(4-fluorophenoxy)propyl)-2,3,4,5-tetrahydro-1H-pyrido[4,3-*b*]indole (C20).** Brown solid, 0.12 g (59.6%). <sup>1</sup>H-NMR (500 Hz, CDCl<sub>3</sub>) δ: 2.08 (m, 2 H, -NCH<sub>2</sub>CH<sub>2</sub>CH<sub>2</sub>O-), 2.85 (t, 2 H, ArCH<sub>2</sub>CH<sub>2</sub>N), 3.21 (t, 2 H, ArCH<sub>2</sub>CH<sub>2</sub>N), 3.86 (t, *J* = 6.6 Hz, 2 H, -NCH<sub>2</sub>CH<sub>2</sub>CH<sub>2</sub>O-), 4.03 (s, 2 H, ArCH<sub>2</sub>N), 4.25 (t, *J* = 5.7 Hz, 2 H, -NCH<sub>2</sub>CH<sub>2</sub>CH<sub>2</sub>O-), 6.89~7.44 (m, 7 H, Ar-H). MS (ESI, positive) *m/z* calcd for C<sub>20</sub>H<sub>21</sub>F<sub>2</sub>N<sub>2</sub>O (M+H): 343.16; found 343.22. Anal. calcd. for C<sub>20</sub>H<sub>20</sub>F<sub>2</sub>N<sub>2</sub>O: C, 70.16; H, 5.89; N, 8.18. Found: C, 70.15; H, 5.90; N, 8.17. HPLC purity: 98.1%.

**8-fluoro-5-(4-(4-fluorophenoxy)butyl)-2,3,4,5-tetrahydro-1H-pyrido[4,3-*b*]indole (C21).** Brown solid, 0.10 g (62.4%). <sup>1</sup>H-NMR (500 Hz, CDCl<sub>3</sub>) δ: 1.77 (m, 2H, -NCH<sub>2</sub>CH<sub>2</sub>CH<sub>2</sub>CH<sub>2</sub>O-), 1.93 (m, 2H, -NCH<sub>2</sub>CH<sub>2</sub>CH<sub>2</sub>CH<sub>2</sub>O-), 3.15 (t, *J* = 4.8 Hz, 2H, ArCH<sub>2</sub>CH<sub>2</sub>N), 3.56 (t, *J* = 5.8 Hz, 2H, ArCH<sub>2</sub>CH<sub>2</sub>N), 3.88 (t, *J* = 6.0 Hz, 2H, -NCH<sub>2</sub>CH<sub>2</sub>CH<sub>2</sub>CH<sub>2</sub>O-), 4.08 (t, *J* = 7.0 Hz, 2H, -NCH<sub>2</sub>CH<sub>2</sub>CH<sub>2</sub>CH<sub>2</sub>O-), 4.37 (s, 2H, ArCH<sub>2</sub>N), 6.79~7.26 (m, 7H, Ar-H). MS (ESI, positive) *m/z* calcd for C<sub>21</sub>H<sub>23</sub>F<sub>2</sub>N<sub>2</sub>O (M+H): 357.18; found 357.10. Anal. calcd. for C<sub>21</sub>H<sub>22</sub>F<sub>2</sub>N<sub>2</sub>O: C, 70.77; H, 6.22; N, 7.86. Found: C, 70.78; H, 6.22; N, 7.87. HPLC purity: 96.4%.

**8-fluoro-5-(5-(4-fluorophenoxy)pentyl)-2,3,4,5-tetrahydro-1H-pyrido[4,3-*b*]indole**

**e (C22).** Brown solid, 0.09 g (55.8%). <sup>1</sup>H-NMR (500 Hz, CDCl<sub>3</sub>) δ: 1.46 (m, 2H, -NCH<sub>2</sub>CH<sub>2</sub>CH<sub>2</sub>CH<sub>2</sub>CH<sub>2</sub>O-), 1.76 (m, 4H, -NCH<sub>2</sub>CH<sub>2</sub>CH<sub>2</sub>CH<sub>2</sub>CH<sub>2</sub>O-), 3.13 (t, *J* = 3.5 Hz, 2H, ArCH<sub>2</sub>CH<sub>2</sub>N), 3.56 (t, *J* = 5.3 Hz, 2H, ArCH<sub>2</sub>CH<sub>2</sub>N), 3.86 (t, *J* = 6.3 Hz, 2H, -NCH<sub>2</sub>CH<sub>2</sub>CH<sub>2</sub>CH<sub>2</sub>CH<sub>2</sub>O-), 4.00 (t, *J* = 7.3 Hz, 2H, -NCH<sub>2</sub>CH<sub>2</sub>CH<sub>2</sub>CH<sub>2</sub>CH<sub>2</sub>O-), 4.36 (s, 2H, ArCH<sub>2</sub>N), 6.79~7.26 (m, 7H, Ar-H). MS (ESI, positive) *m/z* calcd for C<sub>22</sub>H<sub>25</sub>F<sub>2</sub>N<sub>2</sub>O (M+H): 371.19; found 371.24. Anal. calcd. for C<sub>22</sub>H<sub>24</sub>F<sub>2</sub>N<sub>2</sub>O: C, 71.33; H, 6.53; N, 7.56. Found: C, 71.34; H, 6.55; N, 7.56. HPLC purity: 96.9%.

**8-chloro-5-(3-(4-fluorophenoxy)propyl)-2,3,4,5-tetrahydro-1H-pyrido[4,3-b]indole**

**e (C23).** Brown solid, 0.15 g (62.4%). <sup>1</sup>H-NMR (500 Hz, CDCl<sub>3</sub>) δ: 2.18 (m, 2H, -NCH<sub>2</sub>CH<sub>2</sub>CH<sub>2</sub>O-), 2.92 (t, *J* = 5.5 Hz, 2H, ArCH<sub>2</sub>CH<sub>2</sub>N), 3.31 (t, *J* = 5.8 Hz, 2H, ArCH<sub>2</sub>CH<sub>2</sub>N), 3.79 (t, *J* = 5.6 Hz, 2H, -NCH<sub>2</sub>CH<sub>2</sub>CH<sub>2</sub>O-), 4.18 (s, 2H, ArCH<sub>2</sub>N), 4.23 (t, *J* = 6.6 Hz, 2H, -NCH<sub>2</sub>CH<sub>2</sub>CH<sub>2</sub>O-), 6.79~7.36 (m, 7H, Ar-H). MS (ESI, positive) *m/z* calcd for C<sub>20</sub>H<sub>21</sub>ClFN<sub>2</sub>O (M+H): 359.13; found 359.22. Anal. calcd. for C<sub>20</sub>H<sub>20</sub>ClFN<sub>2</sub>O: C, 66.94; H, 5.62; N, 7.81. Found: C, 66.95; H, 5.63; N, 7.81. HPLC purity: 97.3%.

**5-(3-(3-bromophenoxy)propyl)-8-chloro-2,3,4,5-tetrahydro-1H-pyrido[4,3-b]indole**

**le (C24).** Pale solid, 0.11 g (64.2%). <sup>1</sup>H-NMR (500 Hz, CDCl<sub>3</sub>) δ: 2.18 (m, 2H, -NCH<sub>2</sub>CH<sub>2</sub>CH<sub>2</sub>O-), 3.12 (t, *J* = 5.5 Hz, 2H, ArCH<sub>2</sub>CH<sub>2</sub>N), 3.45 (t, *J* = 5.9 Hz, 2H, ArCH<sub>2</sub>CH<sub>2</sub>N), 3.79 (t, *J* = 5.4 Hz, 2H, -NCH<sub>2</sub>CH<sub>2</sub>CH<sub>2</sub>O-), 4.22 (t, *J* = 6.6 Hz, 2H, -NCH<sub>2</sub>CH<sub>2</sub>CH<sub>2</sub>O-), 4.35 (s, 2H, ArCH<sub>2</sub>N), 6.79~7.26 (m, 7H, Ar-H). <sup>13</sup>C-NMR (150 Hz, DMSO-*d*<sub>6</sub>) δ: 19.07, 29.03, 39.49, 40.01, 40.56, 64.79, 101.91, 111.20, 113.89, 117.34, 117.49, 121.17, 122.03, 123.56, 123.92, 125.69, 131.18, 133.52, 134.48,

159.19. MS (ESI, positive)  $m/z$  calcd for  $C_{20}H_{21}BrClN_2O$  (M+H): 419.05; found 419.12. Anal. calcd. for  $C_{20}H_{20}BrClN_2O$ : C, 57.23; H, 4.80; N, 6.67. Found: C, 57.24; H, 4.80; N, 6.67. HPLC purity: 95.7%.

**8-bromo-5-(3-(4-fluorophenoxy)propyl)-2,3,4,5-tetrahydro-1H-pyrido[4,3-b]indole (C25).** Pale solid, 0.11 g (52.8%).  $^1H$ -NMR (500 Hz,  $CDCl_3$ )  $\delta$ : 2.18 (m, 2H, -NCH<sub>2</sub>CH<sub>2</sub>CH<sub>2</sub>O-), 2.95 (t,  $J$  = 5.5 Hz, 2H, ArCH<sub>2</sub>CH<sub>2</sub>N), 3.32 (t,  $J$  = 5.9 Hz, 2H, ArCH<sub>2</sub>CH<sub>2</sub>N), 3.78 (t,  $J$  = 5.5 Hz, 2H, -NCH<sub>2</sub>CH<sub>2</sub>CH<sub>2</sub>O-), 4.19 (s, 2H, ArCH<sub>2</sub>N), 4.23 (t,  $J$  = 6.6 Hz, 2H, -NCH<sub>2</sub>CH<sub>2</sub>CH<sub>2</sub>O-), 6.79~7.26 (m, 7H, Ar-H). MS (ESI, positive)  $m/z$  calcd for  $C_{20}H_{21}BrFN_2O$  (M+H): 403.08; found 403.11. Anal. calcd. for  $C_{20}H_{20}BrFN_2O$ : C, 59.56; H, 5.00; N, 6.95. Found: C, 59.55; H, 5.01; N, 6.94. HPLC purity: 95.6%.

**5-(3-(4-fluorophenoxy)propyl)-8-methyl-2,3,4,5-tetrahydro-1H-pyrido[4,3-b]indole (C26).** Brown solid, 0.09 g (50.8%).  $^1H$ -NMR (500 Hz,  $CDCl_3$ )  $\delta$ : 2.19 (m, 2H, -NCH<sub>2</sub>CH<sub>2</sub>CH<sub>2</sub>O-), 2.43 (s, 3H, -CH<sub>3</sub>), 2.91 (t, 2H, ArCH<sub>2</sub>CH<sub>2</sub>N), 3.31 (t, 2H, ArCH<sub>2</sub>CH<sub>2</sub>N), 3.79 (t,  $J$  = 5.6 Hz, 2H, -NCH<sub>2</sub>CH<sub>2</sub>CH<sub>2</sub>O-), 4.20 (s, 2H, ArCH<sub>2</sub>N), 4.22 (t,  $J$  = 6.6 Hz, 2H, -NCH<sub>2</sub>CH<sub>2</sub>CH<sub>2</sub>O-), 6.79~7.20 (m, 7H, Ar-H). MS (ESI, positive)  $m/z$  calcd for  $C_{21}H_{24}FN_2O$  (M+H): 339.19; found 339.26. Anal. calcd. for  $C_{21}H_{23}FN_2O$ : C, 74.53; H, 6.85; N, 8.28. Found: C, 74.55; H, 6.85; N, 8.28. HPLC purity: 98.2%.

**5-(3-(3-bromophenoxy)propyl)-8-methyl-2,3,4,5-tetrahydro-1H-pyrido[4,3-b]indole (C27).** Brown solid, 0.12 g (55.6%).  $^1H$ -NMR (500 Hz,  $CDCl_3$ )  $\delta$ : 1.93 (s, 3H, -CH<sub>3</sub>), 2.20 (m, 2H, -NCH<sub>2</sub>CH<sub>2</sub>CH<sub>2</sub>O-), 2.98 (t, 2H, ArCH<sub>2</sub>CH<sub>2</sub>N), 3.38 (t,  $J$  = 5.9 Hz,



2H, ArCH<sub>2</sub>CH<sub>2</sub>N), 3.75 (t, 2H, -NCH<sub>2</sub>CH<sub>2</sub>CH<sub>2</sub>O-), 4.22 (t,  $J = 6.6$  Hz, 2H, -NCH<sub>2</sub>CH<sub>2</sub>CH<sub>2</sub>O-), 4.26 (s, 2H, ArCH<sub>2</sub>N), 6.80~7.20 (m, 7H, Ar-H). MS (ESI, positive)  $m/z$  calcd for C<sub>21</sub>H<sub>24</sub>BrN<sub>2</sub>O (M+H): 399.11; found 399.31. Anal. calcd. for C<sub>21</sub>H<sub>23</sub>BrN<sub>2</sub>O: C, 63.16; H, 5.81; N, 7.02. Found: C, 63.15; H, 5.80; N, 7.02. HPLC purity: 96.6%.

**8-fluoro-5-(3-phenoxypropyl)-2,3,4,5-tetrahydro-1H-pyrido[4,3-*b*]indole (C28).**

Brown solid, 0.14 g (66.2%). <sup>1</sup>H-NMR (500 Hz, CDCl<sub>3</sub>)  $\delta$ : 2.19 (m, 2 H, -NCH<sub>2</sub>CH<sub>2</sub>CH<sub>2</sub>O-), 2.83 (t,  $J = 5.6$  Hz, 2H, ArCH<sub>2</sub>CH<sub>2</sub>N), 3.24 (t,  $J = 5.7$  Hz, 2H, ArCH<sub>2</sub>CH<sub>2</sub>N), 3.84 (t,  $J = 6.6$  Hz, 2H, -NCH<sub>2</sub>CH<sub>2</sub>CH<sub>2</sub>O-), 4.10 (s, 2H, ArCH<sub>2</sub>N), 4.23 (t, 2H,  $J = 5.5$  Hz, -NCH<sub>2</sub>CH<sub>2</sub>CH<sub>2</sub>O-), 6.85~7.30 (m, 8H, Ar-H). MS (ESI, positive)  $m/z$  calcd for C<sub>20</sub>H<sub>22</sub>FN<sub>2</sub>O (M+H): 325.17; found 325.09. Anal. calcd. for C<sub>20</sub>H<sub>21</sub>FN<sub>2</sub>O: C, 74.05; H, 6.53; N, 8.64. Found: C, 74.06; H, 6.53; N, 8.64. HPLC purity: 97.4%.

**8-fluoro-5-(3-(4-methoxyphenoxy)propyl)-2,3,4,5-tetrahydro-1H-pyrido[4,3-*b*]in**

**dole (C29).** Pale solid, 0.16 g (55.4%). <sup>1</sup>H-NMR (500 Hz, CDCl<sub>3</sub>)  $\delta$ : 2.16 (m, 2H, -NCH<sub>2</sub>CH<sub>2</sub>CH<sub>2</sub>O-), 2.74 (t, 2H, ArCH<sub>2</sub>CH<sub>2</sub>N), 3.19 (t, 2 H, ArCH<sub>2</sub>CH<sub>2</sub>N), 3.77 (s, 3H, -OCH<sub>3</sub>), 3.79 (t,  $J = 6.6$  Hz, 2H, -NCH<sub>2</sub>CH<sub>2</sub>CH<sub>2</sub>O-), 4.03 (s, 2H, ArCH<sub>2</sub>N), 4.22 (t,  $J = 5.6$  Hz, 2H, -NCH<sub>2</sub>CH<sub>2</sub>CH<sub>2</sub>O-), 6.78~7.19 (m, 7H, Ar-H). MS (ESI, positive)  $m/z$  calcd for C<sub>21</sub>H<sub>24</sub>FN<sub>2</sub>O<sub>2</sub> (M+H): 355.18; found 355.23. Anal. calcd. for C<sub>21</sub>H<sub>23</sub>FN<sub>2</sub>O<sub>2</sub>: C, 71.17; H, 6.54; N, 7.90. Found: C, 71.18; H, 6.53; N, 7.91. HPLC purity: 97.3%.

**5-(3-(2,5-difluorophenoxy)propyl)-8-fluoro-2,3,4,5-tetrahydro-1H-pyrido[4,3-*b*]in**

**dole (C30).** Pale solid, 0.12 g (60.8%). <sup>1</sup>H-NMR (500 Hz, CDCl<sub>3</sub>)  $\delta$ : 2.22 (m, 2H,

-NCH<sub>2</sub>CH<sub>2</sub>CH<sub>2</sub>O-), 3.18 (t, 2H, ArCH<sub>2</sub>CH<sub>2</sub>N), 3.49 (t, 2H, ArCH<sub>2</sub>CH<sub>2</sub>N), 3.83 (t,  $J = 6.2$  Hz, 2H, NCH<sub>2</sub>CH<sub>2</sub>CH<sub>2</sub>O), 4.27 (t,  $J = 5.2$  Hz, 2H, NCH<sub>2</sub>CH<sub>2</sub>CH<sub>2</sub>O), 4.37 (s, 2H, ArCH<sub>2</sub>N), 6.57~7.26 (m, 6H, Ar-H). MS (ESI, positive)  $m/z$  calcd for C<sub>20</sub>H<sub>20</sub>F<sub>3</sub>N<sub>2</sub>O (M+H): 361.15; found 361.21. Anal. calcd. for C<sub>20</sub>H<sub>19</sub>F<sub>3</sub>N<sub>2</sub>O: C, 66.66; H, 5.31; N, 7.77. Found: C, 66.68; H, 5.32; N, 7.78. HPLC purity: 96.9%.

**5-(3-(4-bromophenoxy)propyl)-8-fluoro-2,3,4,5-tetrahydro-1H-pyrido[4,3-b]indole (C31).** Brown solid, 0.13 g (63.4%). <sup>1</sup>H-NMR (500 Hz, CDCl<sub>3</sub>)  $\delta$ : 2.19 (m, 2H, -NCH<sub>2</sub>CH<sub>2</sub>CH<sub>2</sub>O-), 2.95 (t, 2H, ArCH<sub>2</sub>CH<sub>2</sub>N), 3.35 (t,  $J = 5.9$  Hz, 2H, ArCH<sub>2</sub>CH<sub>2</sub>N), 3.81 (t,  $J = 6.6$  Hz, 2H, -NCH<sub>2</sub>CH<sub>2</sub>CH<sub>2</sub>O-), 4.21 (s, 2H, ArCH<sub>2</sub>N), 4.23 (t,  $J = 5.5$  Hz, 2H, -NCH<sub>2</sub>CH<sub>2</sub>CH<sub>2</sub>O-), 6.73~7.38 (m, 7H, Ar-H). MS (ESI, positive)  $m/z$  calcd for C<sub>20</sub>H<sub>21</sub>BrFN<sub>2</sub>O (M+H): 403.08; found 403.23. Anal. calcd. for C<sub>20</sub>H<sub>20</sub>BrFN<sub>2</sub>O: C, 59.56; H, 5.00; N, 6.95. Found: C, 59.57; H, 5.01; N, 6.96. HPLC purity: 95.8%.

**5-(3-(4-(tert-butyl)phenoxy)propyl)-8-fluoro-2,3,4,5-tetrahydro-1H-pyrido[4,3-b]indole (C32).** Brown solid, 0.13 g (52.2%). <sup>1</sup>H-NMR (500 Hz, CDCl<sub>3</sub>)  $\delta$ : 1.29 (s, 9H, -C(CH<sub>3</sub>)<sub>3</sub>), 2.19 (m, 2H, -NCH<sub>2</sub>CH<sub>2</sub>CH<sub>2</sub>O-), 2.86 (t,  $J = 5.5$  Hz, 2H, ArCH<sub>2</sub>CH<sub>2</sub>N), 3.26 (t,  $J = 5.8$  Hz, 2H, ArCH<sub>2</sub>CH<sub>2</sub>N), 3.84 (t,  $J = 6.7$  Hz, 2H, -NCH<sub>2</sub>CH<sub>2</sub>CH<sub>2</sub>O-), 4.12 (s, 2H, ArCH<sub>2</sub>N), 4.23 (t,  $J = 5.5$  Hz, 2H, -NCH<sub>2</sub>CH<sub>2</sub>CH<sub>2</sub>O-), 6.79~7.30 (m, 7H, Ar-H). MS (ESI, positive)  $m/z$  calcd for C<sub>24</sub>H<sub>30</sub>FN<sub>2</sub>O (M+H): 381.23; found 381.32. Anal. calcd. for C<sub>24</sub>H<sub>29</sub>FN<sub>2</sub>O: C, 75.76; H, 7.68; N, 7.36. Found: C, 75.77; H, 7.68; N, 7.37. HPLC purity: 95.6%.

**8-fluoro-5-(3-(m-tolyloxy)propyl)-2,3,4,5-tetrahydro-1H-pyrido[4,3-b]indole (C33).** Brown solid, 0.08 g (55.1%). <sup>1</sup>H-NMR (500 Hz, CDCl<sub>3</sub>)  $\delta$ : 2.19 (m, 2H,

-NCH<sub>2</sub>CH<sub>2</sub>CH<sub>2</sub>O-), 2.32 (s, 3H, -CH<sub>3</sub>), 2.89 (t, *J* = 5.6 Hz, 2H, ArCH<sub>2</sub>CH<sub>2</sub>N), 3.28 (t, *J* = 5.7 Hz, 2H, ArCH<sub>2</sub>CH<sub>2</sub>N), 3.83 (t, *J* = 6.6 Hz, 2H, -NCH<sub>2</sub>CH<sub>2</sub>CH<sub>2</sub>O-), 4.15 (s, 2H, ArCH<sub>2</sub>N), 4.23 (t, *J* = 5.5 Hz, 2H, -NCH<sub>2</sub>CH<sub>2</sub>CH<sub>2</sub>O-), 6.67~7.26 (m, 7H, Ar-H). MS (ESI, positive) *m/z* calcd for C<sub>21</sub>H<sub>24</sub>FN<sub>2</sub>O (M+H): 339.19; found 339.21. Anal. calcd. for C<sub>21</sub>H<sub>23</sub>FN<sub>2</sub>O: C, 74.53; H, 6.85; N, 8.28. Found: C, 74.52; H, 6.85; N, 8.27. HPLC purity: 98.3%.

**8-fluoro-5-(3-(p-tolyloxy)propyl)-2,3,4,5-tetrahydro-1H-pyrido[4,3-b]indole**

(C34). Brown solid, 0.11 g (60.2%). <sup>1</sup>H-NMR (500 Hz, CDCl<sub>3</sub>) δ: 2.13 (m, 2H, -NCH<sub>2</sub>CH<sub>2</sub>CH<sub>2</sub>O-), 2.27 (s, 3H, -CH<sub>3</sub>), 3.04 (br, 2H, ArCH<sub>2</sub>CH<sub>2</sub>N), 3.34 (br, 2H, ArCH<sub>2</sub>CH<sub>2</sub>N), 3.75 (t, *J* = 5.5 Hz, 2H, -NCH<sub>2</sub>CH<sub>2</sub>CH<sub>2</sub>O-), 4.17 (t, *J* = 6.5 Hz, 2H, -NCH<sub>2</sub>CH<sub>2</sub>CH<sub>2</sub>O-), 4.26 (s, 2 H, ArCH<sub>2</sub>N), 6.73 (d, *J* = 8.6 Hz, 2H), 6.87 (dt, *J* = 2.4 Hz, 9.0 Hz, 1H), 6.97 (dd, *J* = 2.5 Hz, 9.2 Hz, 1H), 7.05 (d, *J* = 8.6 Hz, 2H), 7.19 (dd, *J* = 4.1 Hz, 8.9 Hz, 1H). MS (ESI, positive) *m/z* calcd for C<sub>21</sub>H<sub>24</sub>FN<sub>2</sub>O (M+H): 339.19; found 339.25. Anal. calcd. for C<sub>21</sub>H<sub>23</sub>FN<sub>2</sub>O: C, 74.53; H, 6.85; N, 8.28. Found: C, 74.53; H, 6.85; N, 8.27. HPLC purity: 97.6%.

**5-(3-(2-chlorophenoxy)propyl)-8-fluoro-2,3,4,5-tetrahydro-1H-pyrido[4,3-b]indole**

(C35). Pale solid, 0.11 g (66.9%). <sup>1</sup>H-NMR (500 Hz, CDCl<sub>3</sub>) δ: 2.06 (m, 2H, -NCH<sub>2</sub>CH<sub>2</sub>CH<sub>2</sub>O-), 3.11 (t, 2H, ArCH<sub>2</sub>CH<sub>2</sub>N), 3.52 (t, 2H, ArCH<sub>2</sub>CH<sub>2</sub>N), 3.88 (t, 2H, -NCH<sub>2</sub>CH<sub>2</sub>CH<sub>2</sub>O-), 4.33 (s, 2H, ArCH<sub>2</sub>N), 4.39 (t, 2H, -NCH<sub>2</sub>CH<sub>2</sub>CH<sub>2</sub>O-), 6.80~7.39 (m, 7H, Ar-H). MS (ESI, positive) *m/z* calcd for C<sub>20</sub>H<sub>21</sub>ClFN<sub>2</sub>O (M+H): 359.13; found 359.25. Anal. calcd. for C<sub>20</sub>H<sub>20</sub>ClFN<sub>2</sub>O: C, 66.94; H, 5.62; N, 7.81. Found: C, 66.95; H, 5.63; N, 7.82. HPLC purity: 96.8%.

**8-fluoro-5-(3-(*o*-tolylloxy)propyl)-2,3,4,5-tetrahydro-1*H*-pyrido[4,3-*b*]indole (C36).**

Pale solid, 0.16 g (70.2%). <sup>1</sup>H-NMR (500 Hz, CDCl<sub>3</sub>) δ: 2.20 (m, 2H, -NCH<sub>2</sub>CH<sub>2</sub>CH<sub>2</sub>O-), 2.29 (s, 3H, -CH<sub>3</sub>), 3.11 (t, 2H, ArCH<sub>2</sub>CH<sub>2</sub>N), 3.40 (t, 2H, ArCH<sub>2</sub>CH<sub>2</sub>N), 3.86 (t, *J* = 6.7 Hz, 2H, -NCH<sub>2</sub>CH<sub>2</sub>CH<sub>2</sub>O-), 4.26 (t, *J* = 5.3 Hz, 2H, -NCH<sub>2</sub>CH<sub>2</sub>CH<sub>2</sub>O-), 4.30 (s, 2H, ArCH<sub>2</sub>N), 6.70~7.26 (m, 7H, Ar-H). MS (ESI, positive) *m/z* calcd for C<sub>21</sub>H<sub>24</sub>FN<sub>2</sub>O (M+H): 339.19; found 339.23. Anal. calcd. for C<sub>21</sub>H<sub>23</sub>FN<sub>2</sub>O: C, 74.53; H, 6.85; N, 8.28. Found: C, 74.55; H, 6.86; N, 8.27. HPLC purity: 98.2%.

**5-(3-(3-bromophenoxy)propyl)-8-fluoro-2,3,4,5-tetrahydro-1*H*-pyrido[4,3-*b*]indole (C37).**

Pale solid, 0.12 g (65.6%). <sup>1</sup>H-NMR (500 Hz, CDCl<sub>3</sub>) δ: 2.17 (m, 2H, -NCH<sub>2</sub>CH<sub>2</sub>CH<sub>2</sub>O-), 3.12 (t, 2H, ArCH<sub>2</sub>CH<sub>2</sub>N), 3.45 (t, 2H, ArCH<sub>2</sub>CH<sub>2</sub>N), 3.80 (t, *J* = 6.6 Hz, 2H, -NCH<sub>2</sub>CH<sub>2</sub>CH<sub>2</sub>O-), 4.22 (t, *J* = 5.4 Hz, 2H, -NCH<sub>2</sub>CH<sub>2</sub>CH<sub>2</sub>O-), 4.35 (s, 2H, ArCH<sub>2</sub>N), 6.78~7.22 (m, 7H, Ar-H). <sup>13</sup>C-NMR (150 Hz, CDCl<sub>3</sub>) δ: 22.77, 28.20, 29.47, 40.70, 42.56, 67.72, 102.00, 102.03, 102.82, 102.98, 109.01, 109.18, 110.72, 110.78, 113.94, 117.20, 122.04, 123.26, 124.67, 124.74, 131.11, 132.66, 133.60, 156.17, 157.71, 159.60. MS (ESI, positive) *m/z* calcd for C<sub>20</sub>H<sub>21</sub>BrFN<sub>2</sub>O (M+H): 403.08; found 403.11. Anal. calcd. for C<sub>20</sub>H<sub>20</sub>BrFN<sub>2</sub>O: C, 59.56; H, 5.00; N, 6.95. Found: C, 59.57; H, 5.00; N, 6.97. HPLC purity: 96.5%.

**5-(3-(2,3-difluorophenoxy)propyl)-8-fluoro-2,3,4,5-tetrahydro-1*H*-pyrido[4,3-*b*]indole (C39).**

Pale solid, 0.13 g (60.3%). <sup>1</sup>H-NMR (500 Hz, CDCl<sub>3</sub>) δ: 2.21 (m, 2H, -NCH<sub>2</sub>CH<sub>2</sub>CH<sub>2</sub>O-), 3.19 (t, 2H, ArCH<sub>2</sub>CH<sub>2</sub>N), 3.50 (t, 2H, ArCH<sub>2</sub>CH<sub>2</sub>N), 3.86 (t, *J* = 6.8 Hz, 2H, -NCH<sub>2</sub>CH<sub>2</sub>CH<sub>2</sub>O-), 4.13 (t, 2H, -NCH<sub>2</sub>CH<sub>2</sub>CH<sub>2</sub>O-), 4.28 (s, 2H,

ArCH<sub>2</sub>N), 6.8~7.05 (m, 6H, Ar-H). MS (ESI, positive) m/z calcd for C<sub>20</sub>H<sub>20</sub>F<sub>3</sub>N<sub>2</sub>O (M+H): 361.15; found 361.22. Anal. calcd. for C<sub>20</sub>H<sub>19</sub>F<sub>3</sub>N<sub>2</sub>O: C, 66.66; H, 5.31; N, 7.77. Found: C, 66.68; H, 5.29; N, 7.77. HPLC purity: 97.0%.

**8-fluoro-5-(3-(2,4,6-trifluorophenoxy)propyl)-2,3,4,5-tetrahydro-1H-pyrido[4,3-b]indole (C40).** Brown solid, 0.11 g (59.8%). <sup>1</sup>H-NMR (500 Hz, CDCl<sub>3</sub>) δ: 2.09 (m, 2H, -NCH<sub>2</sub>CH<sub>2</sub>CH<sub>2</sub>O-), 3.02 (t, *J* = 5.5 Hz, 2H, ArCH<sub>2</sub>CH<sub>2</sub>N), 3.42 (t, *J* = 5.8 Hz, 2H, ArCH<sub>2</sub>CH<sub>2</sub>N), 3.96 (t, *J* = 7.0 Hz, 2H, -NCH<sub>2</sub>CH<sub>2</sub>CH<sub>2</sub>O-), 4.22 (s, 2H, ArCH<sub>2</sub>N), 4.31 (t, 2H, -NCH<sub>2</sub>CH<sub>2</sub>CH<sub>2</sub>O-), 6.45~7.29 (m, 5H, Ar-H). MS (ESI, positive) m/z calcd for C<sub>20</sub>H<sub>19</sub>F<sub>4</sub>N<sub>2</sub>O (M+H): 379.14; found 379.30. Anal. calcd. for C<sub>20</sub>H<sub>18</sub>F<sub>4</sub>N<sub>2</sub>O: C, 63.49; H, 4.80; N, 7.40. Found: C, 63.50; H, 4.81; N, 7.40. HPLC purity: 97.3%.

**5-(3-(2,6-difluorophenoxy)propyl)-8-fluoro-2,3,4,5-tetrahydro-1H-pyrido[4,3-b]indole (C41).** Brown solid, 0.13 g (56.6%). <sup>1</sup>H-NMR (500 Hz, CDCl<sub>3</sub>) δ: 2.13 (m, 2H, -NCH<sub>2</sub>CH<sub>2</sub>CH<sub>2</sub>O-), 3.12 (t, *J* = 5.5 Hz, 2H, ArCH<sub>2</sub>CH<sub>2</sub>N), 3.50 (t, *J* = 6.0 Hz, 2H, ArCH<sub>2</sub>CH<sub>2</sub>N), 4.07 (t, *J* = 7.1 Hz, 2H, -NCH<sub>2</sub>CH<sub>2</sub>CH<sub>2</sub>O-), 4.13 (s, 2 H, ArCH<sub>2</sub>N), 4.29 (t, *J* = 5.4 Hz, 2H, -NCH<sub>2</sub>CH<sub>2</sub>CH<sub>2</sub>O-), 6.89~7.27 (m, 6 H, Ar-H). MS (ESI, positive) m/z calcd for C<sub>20</sub>H<sub>20</sub>F<sub>3</sub>N<sub>2</sub>O (M+H): 361.15; found 361.16. Anal. calcd. for C<sub>20</sub>H<sub>19</sub>F<sub>3</sub>N<sub>2</sub>O: C, 66.66; H, 5.31; N, 7.77. Found: C, 66.67; H, 5.30; N, 7.77. HPLC purity: 98.6%.

**8-fluoro-5-(3-(2,3,4-trifluorophenoxy)propyl)-2,3,4,5-tetrahydro-1H-pyrido[4,3-b]indole (C42).** Brown solid, 0.11 g (54.7%). <sup>1</sup>H-NMR (500 Hz, CDCl<sub>3</sub>) δ: 2.19 (m, 2H, -NCH<sub>2</sub>CH<sub>2</sub>CH<sub>2</sub>O-), 2.95 (t, *J* = 5.1 Hz, 2H, ArCH<sub>2</sub>CH<sub>2</sub>N), 3.35 (t, *J* = 5.8 Hz, 2H, ArCH<sub>2</sub>CH<sub>2</sub>N), 3.85 (t, *J* = 6.7 Hz, 2H, -NCH<sub>2</sub>CH<sub>2</sub>CH<sub>2</sub>O-), 4.19 (t, *J* = 5.5 Hz, 2H,

-NCH<sub>2</sub>CH<sub>2</sub>CH<sub>2</sub>O-), 4.21 (s, 2H, ArCH<sub>2</sub>N), 6.48~7.25 (m, 5H, Ar-H). MS (ESI, positive) m/z calcd for C<sub>20</sub>H<sub>19</sub>F<sub>4</sub>N<sub>2</sub>O (M+H): 379.14; found 379.27. Anal. calcd. for C<sub>20</sub>H<sub>18</sub>F<sub>4</sub>N<sub>2</sub>O: C, 63.49; H, 4.80; N, 7.40. Found: C, 63.51; H, 4.80; N, 7.40. HPLC purity: 96.2%.

### 3. Structure-activity relationships

Firstly, the role of side chain attached to the carboline N5 atom was investigated. Compounds **C1-C3** with substituted benzyl groups showed broader antifungal spectrum compared with the lead compound **1**, but their antifungal activity against *C. albicans* and *C. neoformans* was slightly decreased. Interestingly, **C1-C3** also showed moderate inhibitory activity against *A. fumigatus*, while **FLC** was inactive. On the contrary, other substitutions (compounds **C4-C10**), such as benzoyl group, phenylacetyl, or alkyl group, led to almost loss of the antifungal activity, indicating that the side chain attached to the **N5** atom was important for the antifungal activity.

Moreover, compounds **C11-C42** with a longer side chain (a phenoxyalkyl or alkyylaniline side chain) were also synthesized. Most of these compounds, particularly **C19-C42**, showed better inhibitory activity and broader antifungal spectrum than compounds **C1-C10** and the lead compound **1**. The results suggested that a flexible and moderate hydrophobic side chain was more favorable for the antifungal activity. Compounds with various substitutions attached to the **N8** atom were also designed and synthesized (compounds **C14**, **C17**, **C18** and **C23**). Among them, compound **C23** showed better activity and broader antifungal spectrum with a MIC<sub>80</sub> value of 4 µg/mL against all the tested *Candida species*. The introduction of the alkyl

substitutions such as methyl (**C12**), ethyl (**C17**) or propyl (**C18**) on the **N8** atom resulted in obvious decrease of the inhibitory activity. Moreover, the precursor of compound **C23**, with ethoxycarbonyl group at the **N8** atom was totally inactive (data not shown). The SAR on the **N8** atom revealed that free NH was more favorable to enhance the antifungal activity.

Compounds with different substitutions on the aromatic ring of the carboline scaffold were also designed and synthesized (compounds **C11-C16** and **C22-C27**). The electron-withdrawing group such as CF<sub>3</sub> (**C13**) and multi-halogens such as 2,4-2Cl (**C16**) decreased the inhibitory activity, with the MIC<sub>80</sub> value larger than 64 µg/mL against *C. albicans*. On the contrary, electron-donating group such as methyl (**C12**), methoxyl (**C15**) and single halogen (compounds **C22-C25**) could slightly enhance the antifungal activity. Among them, compounds **C23** and **C25** showed good antifungal activity against all tested *Candida species* with MIC<sub>80</sub> values of 4 µg/mL, which were better than the lead compound **1**. Moreover, they showed comparable inhibitory activity against *C. krusei* compared with **FLC** (MIC<sub>80</sub> = 4 µg/mL).

The antifungal activity of compounds **C20-C22** with different length of alkyl side chain was investigated. Among them, compound **C20**, with a propyl side chain, showed the best antifungal activity. Replacement of the phenoxyalkyl group (**C20**) by the alkylniline side chain (**C19**) led to slight decrease of the antifungal activity, indicating the oxygen atom in the side chain was more favorable than the nitrogen atom. The effect of various substitutions on the terminal phenyl group of the side chain was also investigated (compounds **C28-C42**). Compound **C38** with 4-Cl

substitution showed potent inhibitory activity against all the tested fungal pathogens (MIC<sub>80</sub> range: 1 µg/mL to 4 µg/mL). It showed the best antifungal activity against *C. albicans* and *T. rubrum* with MIC<sub>80</sub> values of 2 µg/mL. Moreover, compound **C38** also showed potent inhibitory activity against *C. neoformans* and *M. gypseum* (MIC<sub>80</sub> = 1 µg/mL), which was superior or comparable to **FLC**. For the *C. krusei* strain, compound **C38** also showed comparable inhibitory activity to **FLC** with a MIC<sub>80</sub> value of 4 µg/mL. In contrast, compound **C35** with 2-Cl substitution showed obviously decreased antifungal activity (*C. albicans*, MIC<sub>80</sub> = 32 µg/mL). The 3-Br substituted derivative **C37** also showed potent inhibitory activity against *C. albicans* and *M. gypseum* (MIC<sub>80</sub> = 2 µg/mL). Moreover, its inhibitory activity against *C. krusei* (MIC<sub>80</sub> = 2 µg/mL) and *T. rubrum* (MIC<sub>80</sub> = 2 µg/mL) was comparable to **FLC**. Moreover, compounds **C39-C42** with multi-fluorine substitutions showed slightly increased antifungal activity compared with the 4-F substituted compound **C20**. Other compounds with substitutions such as 4-Br (**C31**), 4-*tert*-butyl (**C32**), 3-CH<sub>3</sub> (**C33**), 4-CH<sub>3</sub> (**C34**), and 2-CH<sub>3</sub> (**C36**) also showed moderate inhibitory activity against *C. albicans* (MIC<sub>80</sub> = 8 µg/mL). Interestingly, most compounds showed slightly better inhibitory activity against *C. neoformans* than *C. albicans*. Among the synthesized carboline derivatives, the most active compound **C38** represent a promising antifungal lead with novel chemotype, which was subjected to a series of *in vitro* assays.

#### **4. Experimental protocols of biological assays**

##### ***In vitro* antifungal testing**

*In vitro* antifungal activity was measured by the serial dilution method in 96-well



microtest plates<sup>2,3</sup>. Test fungal strains were obtained from the American Type Culture Collection (ATCC) or were clinical isolates. The determination of minimum inhibitory concentration (MIC) was performed according to the recommendations of National Committee for Clinical Laboratory Standards (NCCLS) with RPMI 1640 (Sigma) buffered with 0.165M MOPS (Sigma) as the test medium. The MIC<sub>80</sub> values were defined as the lowest concentrations of the drugs (alone or in combination) that inhibited fungal growth by 80% compared with that of the drug-free wells. The fractional inhibitory concentration (FIC) index is defined as the sum of the MIC<sub>80</sub> of each drug when used in combination divided by the MIC<sub>80</sub> of the drug used alone. Synergy and antagonism were defined by FIC indices of  $\leq 0.5$  and  $> 4$ , respectively. An FIC index result of  $> 0.5$  but  $\leq 4$  was considered indifferent<sup>4,5</sup>. Test compounds were dissolved in DMSO serially diluted in growth medium. The yeast strains were incubated at 35°C, and the dermatophytes at 28°C. Growth MIC<sub>80</sub> was determined at 24 h for *Candida spp.*, at 72 h for *C. neoformans*, and at 7 days for *filamentous* fungi.

#### **Time-kill curves for testing fungicidal activity**

Time-kill curves were used for testing the fungicidal activity of lead compound **1** and compound **C38**. The experimental procedure was performed according to the method reported by Jiang *et al*<sup>4</sup>. *C. albicans* SC5314 (**FLC** sensitive with MIC<sub>80</sub> = 0.5 µg/mL) and *C. albicans* 103 (**FLC** resistant with MIC<sub>80</sub> > 64µg/mL) in RPMI 1640 medium were prepared respectively at the starting inoculum of 10<sup>5</sup> CFU/mL. The concentration for **FLC** and lead compound **1** were both 32 µg/mL, and a drug-free sample served as a growth control. Concentrations for compound **C38** were 2, 4, 8, 16,

and 32 µg/mL, respectively. DMSO comprised < 1% of the total test volume. At predetermined time points (0, 12, 24, and 48 h after incubation with agitation at 35°C), a 100-µL aliquot was removed from every solution and serially diluted 10-fold in sterile water. A 100-µl aliquot from each dilution was streaked on the Sabouraud dextrose agar plate. Colony counts were determined after incubation at 35°C for 48 h. All time-kill curve experiments were conducted in duplicate, and mean colony count data (log<sub>10</sub> CFU/mL) were plotted as a function of time for each isolate.

#### ***In vitro* biofilm inhibition assay**

The experimental procedure was performed according to the method reported by Cao et al <sup>6</sup>. Standardized *C. albicans* cells (1.0×10<sup>6</sup> cells/mL in SC medium) were introduced into the wells of 96-well tissue culture plates (Corning Inc., Corning, NY) and incubated at 37°C for the initial 1 h adhesion. After that, the medium was aspirated and non-adherent cells were removed. Fresh RPMI 1640 medium with or without drugs was then added to adherent cells. The concentration for **FLC** was 64 µg/mL, and a drug-free sample served as a control. Concentrations for compound **C38** were 2, 4, 8, 16, 32, and 64 µg/mL, respectively. Then the plates were incubated for a further 48 h at 37°C. A semi-quantitative measure of biofilm formation was calculated by using an XTT [2,3-bis(2-methoxy-4-nitro-5-sulfo-phenyl)-2H-tetrazolium-5-carboxanilide] reduction assay <sup>7</sup>. Briefly, adherent cells were washed twice with PBS and then incubated with 0.5 mg/mL XTT and 10 µM menadione in PBS at 37°C for 90 min. Optical density at 490 nm (OD<sub>490</sub>) was determined using a microtiter plate reader.

### **Inhibition of hyphal growth assay**

*C. albicans* SC5314 cells were incubated at 37°C in RPMI 1640 for 16 h in the absence or in the presence of different concentrations of compound **C38** (2 to 8 µg/mL) or **FLC** (8 µg/mL). All cells were viewed by light microscopy at × 400 to assess hyphal formation.

### **Transmission Electron Microscopy**

Transmission electron microscopies of *C. albicans* SC5314 cells were obtained according to the protocol described by Jia et al <sup>8</sup>. In the absence or presence of **FLC** (8 µg/mL) or compound **C38** (8 µg/mL), *C. albicans* SC5314 cells were collected after 8 h of growth in liquid RPMI 1640 medium supplemented with 0.0025% uridine, washed twice with PBS solution, fixed at 48°C for 24 h in 500 mL fixative solution (sodium cacodylate buffer, pH 7.2, containing 4% polyoxymethylene). The samples were then washed with saline and postfixed for 90 min with 1% phosphotungstic acid. The fixed cells were dehydrated through a graded series of ethanol and embedded with EPON-812. Ultrathin sections were prepared and observed after double staining with uranium and lead under a transmission electron microscope (HITACHI H-800, Japan) with  $1 \times 10^4$  magnification.

### **GC-MS analysis of sterol composition**

Analysis of sterol composition in *C. albicans* SC5314 cells was performed by means of GC-MS, wherein the components of a complex sterol mixture were separated and subsequently analyzed by mass spectrometry. Samples for gas chromatography-mass spectrometry were prepared according to the procedure described by Jia et al <sup>8</sup>. The

sterols in *C. albicans* cells were analyzed using a 7890A GC system (Agilent Technologies). GC-MS data were analyzed using Agilent software, and using NIST Spectrum Database to match the MS data.

### Cytochrome P450 enzymes inhibition assay

| Material             |          | Equipment         |                      |
|----------------------|----------|-------------------|----------------------|
| HLM                  | BD99268  | Janus             | PerkinElmer          |
| Protein Conc.(mg/mL) | 19.2     | Mass Spectrometer | Xevo TQ-S, Waters    |
| MgCl <sub>2</sub>    | Sigma    | UPLC              | UPLC H-Class, Waters |
| NADPH                | Roche    |                   |                      |
| Tris                 | Sigma    |                   |                      |
| BSA                  | Solarbio |                   |                      |

HLM, human liver microsome

| Probe Substrate | Source               | Isoform | Conc.( $\mu$ M) | Metabolite             |
|-----------------|----------------------|---------|-----------------|------------------------|
| Tolbutamide     | Sigma                | 2C9     | 50              | 4-Hydroxy Tolbutamide  |
| S-mephenytoin   | Sigma                | 2C19    | 10              | 4'-Hydroxy Mephenytoin |
| Testosterone    | Dr.Ehrenstorfer GmbH | 3A4-M   | 20              | 6-Hydroxy Testosterone |
| Midazolam       | TRC                  | 3A4-T   | 2               | 1'-Hydroxy Midazolam   |

| Positive Inhibitor | Source     | Isoform | Conc.( $\mu$ M) |
|--------------------|------------|---------|-----------------|
| Sulfaphenazole     | Sigma      | 2C9     | 2/0.2/0.02      |
| Tranlycypromine    | Santa Cruz | 2C19    | 33.3/3.33/0.333 |
| Ketoconazole       | TCI        | 3A4-M   | 0.1/0.01/0.001  |
| Ketoconazole       | TCI        | 3A4-T   | 0.1/0.01/0.001  |

Experiments are performed in 96-well plates with final incubation volume of 100  $\mu$ L per well. Each well contains 20  $\mu$ L HLM (final concentration of HLM 0.3 mg/mL) and 50  $\mu$ L test compound or positive control inhibitor mixture and 20  $\mu$ L probe substrates in 0.1M Tris (pH 7.4). After pre-incubated at 37°C for 10 min, the reaction

starts with the addition of 10  $\mu$ L NADPH to make it 1 mM final concentration. Plates are incubated at 37°C for 15 min before reactions are quenched by the addition of 100  $\mu$ L acetonitrile with a mixture of internal standard (propranolol, nadolol) (50 nM). After reactions are terminated, plates are centrifuged, and supernatants are analyzed by LC/MS/MS.

## References

- (1) Kalin JH, Butler KV, Akimova T et al. Second-generation histone deacetylase 6 inhibitors enhance the immunosuppressive effects of Foxp3+ T-regulatory cells. *J Med Chem* 2012; 55: 639-51.
- (2) *Clinical and Laboratory Standards Institute/National Committee for Clinical Laboratory Standards: Reference method for broth dilution antifungal susceptibility testing of Yeast. Approved Standard, edn 3; Document M38-A2.* Wayne, PA: Clinical and Laboratory Standards Institute; 2008.
- (3) *Clinical and Laboratory Standards Institute/National Committee for Clinical Laboratory Standards: Reference method for broth dilution antifungal susceptibility testing of Yeast. Approved Standard, edn 3; Document M27-A3.* Wayne, PA: Clinical and Laboratory Standards Institute; 2009.
- (4) Quan H, Cao YY, Xu Z et al. Potent in vitro synergism of fluconazole and berberine chloride against clinical isolates of *Candida albicans* resistant to fluconazole. *Antimicrob Agents Chemother* 2006; 50: 1096-9.
- (5) Odds FC. Synergy, antagonism, and what the checkerboard puts between them. *J Antimicrob Chemother* 2003; 52: 1.

- (6) Cao Y, Dai B, Wang Y et al. In vitro activity of baicalein against *Candida albicans* biofilms. *Int J Antimicrob Agents* 2008; 32: 73-7.
- (7) Klotz SA, Drutz DJ, Zajic JE. Factors governing adherence of *Candida* species to plastic surfaces. *Infect Immun* 1985; 50: 97-101.
- (8) Jia XM, Wang Y, Jia Y et al. RTA2 is involved in calcineurin-mediated azole resistance and sphingoid long-chain base release in *Candida albicans*. *Cell Mol Life Sci* 2009; 66: 122-34.

**5. A zoom out figure for the morphology of the whole fungi cell**

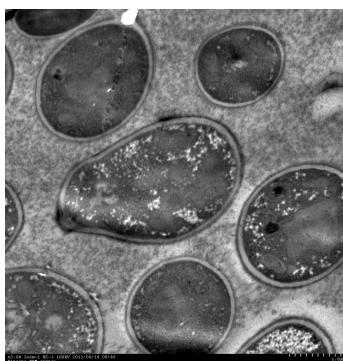

**Figure S1.** A zoom out figure to show the morphology of the whole fungi cell after treated with compound **C38** at 8 µg/mL.

## 6. *In vitro* CYP inhibition assessment of positive drugs

**Table S1.** *In vitro* CYP inhibition assessment of positive inhibitors.

| Positive inhibitor | Isoenzyme | % Inhibition |           |            | IC <sub>50</sub><br>μM | Potential inhibition <sup>a</sup> |
|--------------------|-----------|--------------|-----------|------------|------------------------|-----------------------------------|
|                    |           | 25<br>μM     | 2.5<br>μM | 0.25<br>μM |                        |                                   |
| Sulfaphenazole     | 2C9       | 92           | 59        | 10         | 0.147                  | High                              |
| Tranycypromine     | 2C19      | 87           | 54        | 17         | 2.69                   | high                              |
| Ketoconazole       | 3A4-T     | 85           | 28        | 3          | 0.0225                 | High                              |
| Ketoconazole       | 3A4-M     | 74           | 16        | -2         | 0.039                  | High                              |

<sup>a</sup> IC<sub>50</sub> > 10 μM, CYP inhibition low; 10 μM > IC<sub>50</sub> > 3 μM, CYP inhibition moderate; 3 μM > IC<sub>50</sub>, CYP inhibition high.
